# Supplementary material for: Assembly of the Synaptonemal Complex Is a Highly Temperature-Sensitive Process That Is Supported by PGL-1 During Caenorhabditis elegans Meiosis
Source: PubMed Central journal article supplement (PMC3618346; doi:10.1534/g3.112.005165), 2013-04-01
Supplement: supp_g3.112.005165_FigureS3.pdf [file supp_g3.112.005165_FigureS3.pdf]

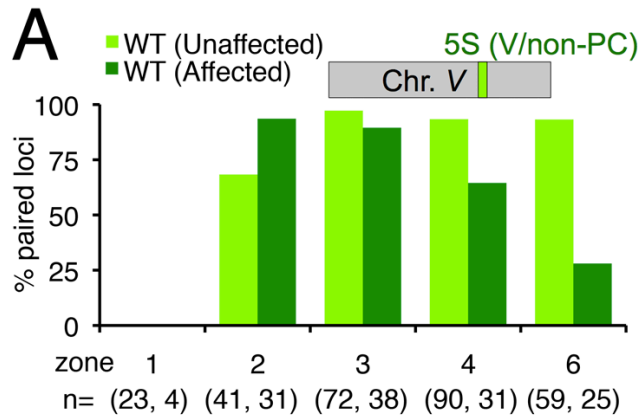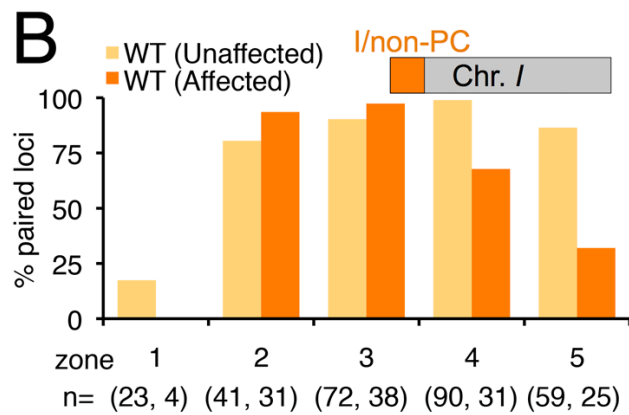

**Figure S3** Decrease in homologous pairing frequency in a wild-type worm cultured at 26°C. Pairing efficiency at the indicated locus is represented as the percentage of nuclei with paired signals in each zone in the gonads of wild type worms cultured at 26°C. There are two types of phenotype: WT(Unaffected) – no decrease in pairing efficiency in pachytene stage, WT(Affected) - decrease in pairing efficiency in pachytene stage.
