# Supplementary material for: Assembly of the Synaptonemal Complex Is a Highly Temperature-Sensitive Process That Is Supported by PGL-1 During Caenorhabditis elegans Meiosis
Source: PubMed Central journal article supplement (PMC3618346; doi:10.1534/g3.112.005165), 2013-04-01
Supplement: supp_g3.112.005165_FigureS5.pdf [file supp_g3.112.005165_FigureS5.pdf]

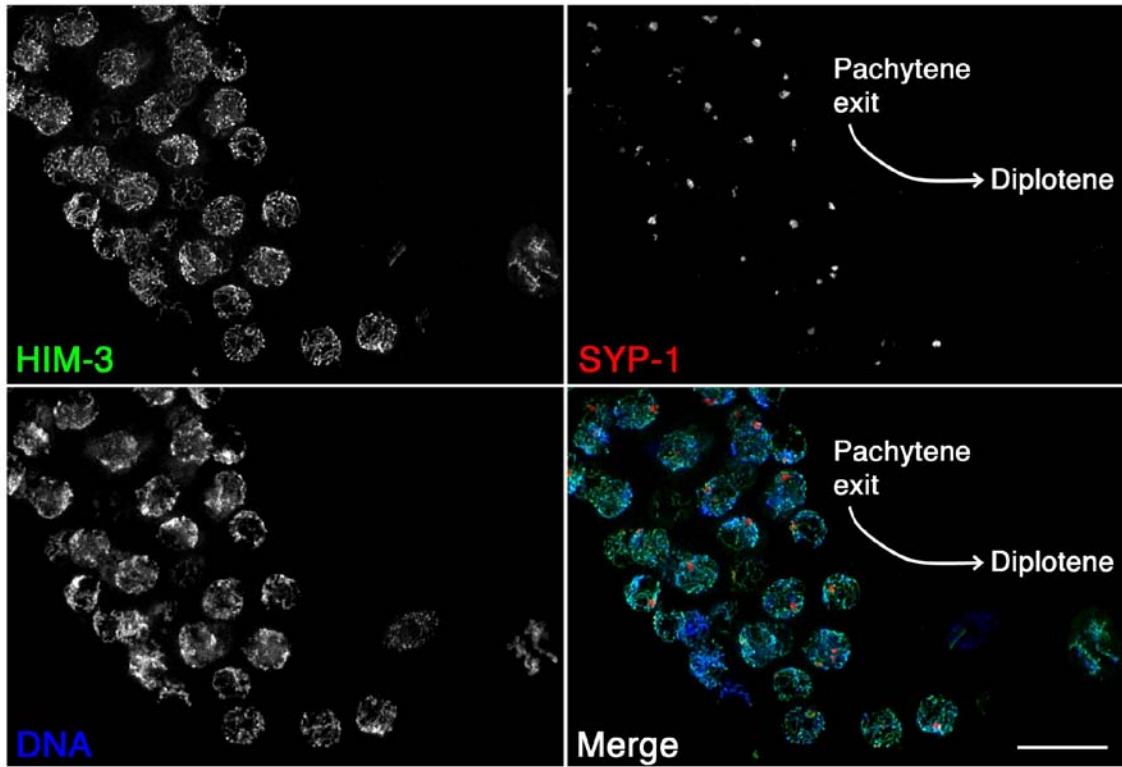

**Figure S5** SYP-1 aggregates disappear at pachytene exit. A projection image of pachytene exit in the wild type cultured at 26.5°C for 24 hours stained by HIM-3/SYP-1 IF. SYP-1 aggregates become smaller and fragmented at pachytene exit and disappear in diplotene nuclei. Bar: 10 $\mu$ m.
